# Supplementary material for: Serum chemokine (CC motif) ligand 2 level as a diagnostic, predictive, and prognostic biomarker for prostate cancer
Source: PubMed Central journal article supplement (PMC4885000; doi:10.18632/oncotarget.6690), 2015-12-19
Supplement: oncotarget-07-8389-s001.pdf [file oncotarget-07-8389-s001.pdf]

**Serum chemokine (CC motif) ligand 2 level as a diagnostic, predictive, and prognostic biomarker for prostate cancer**

**Supplementary Material**

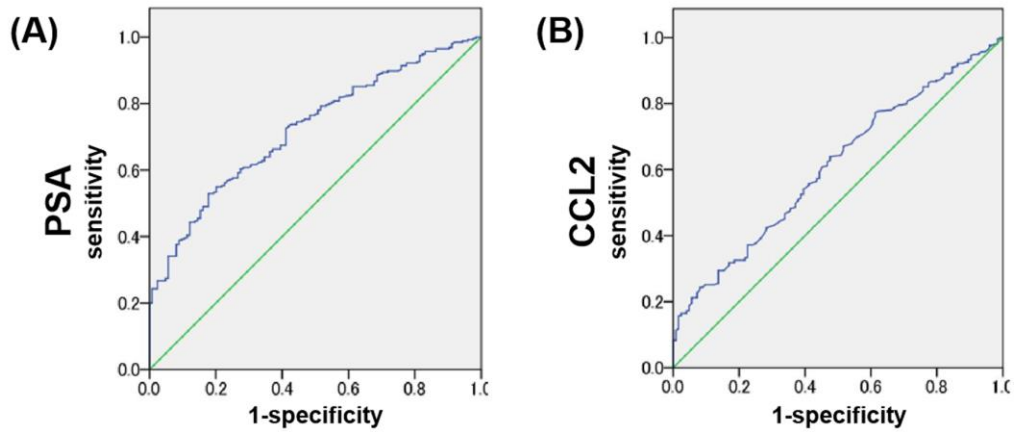

**Supplementary Fig. S1** – ROC curves of PSA (A) and CCL2 (B) in 379 men who underwent prostate biopsy.

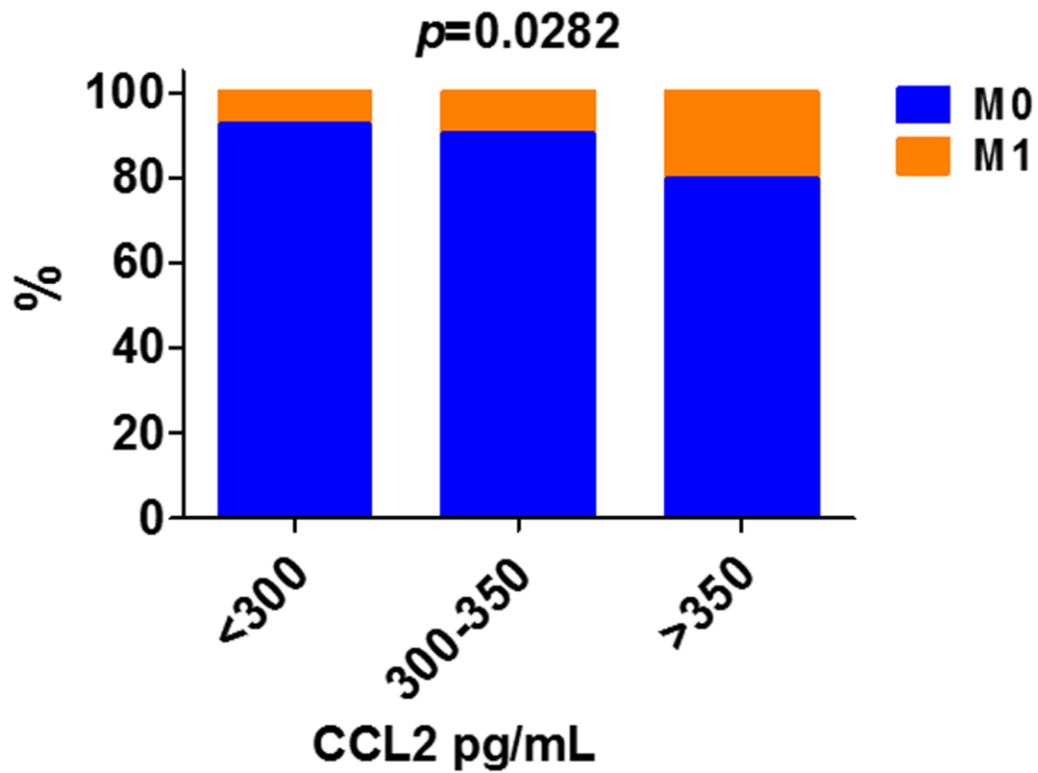

**Supplementary Fig. S2** – Analysis of M1 distribution based on CCL2 levels showed that patients with higher CCL2 levels had significantly higher prevalence of metastasis ( $p=0.0282$ ).

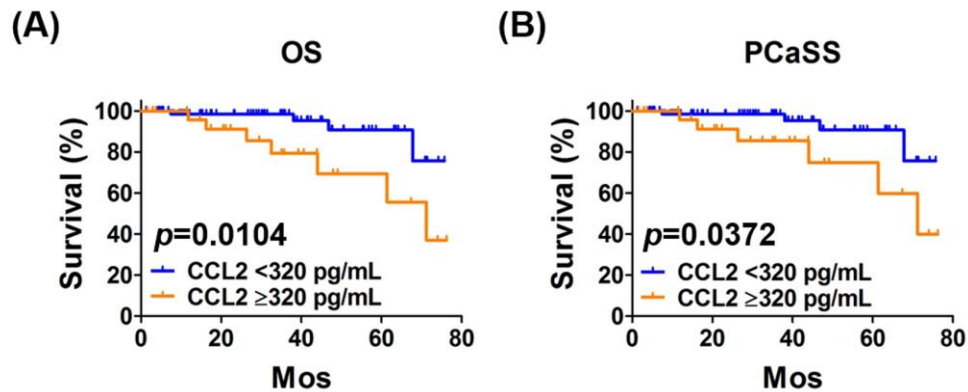

**Supplementary Fig. S3** – Kaplan-Meier curves of OS (A) and PCaSS (B) in 102 patients treated with ADT were drawn and patients with CCL2  $\geq 320$  pg/mL and CCL2  $< 320$  pg/mL were statistically compared using log-rank test. Five-year OS rate was 68.7% and 90.8% in patients with CCL2  $\geq 320$  pg/mL and  $< 320$  pg/mL, respectively. Five-year PCaSS rate was 74.7% and 90.8% in patients with CCL2  $\geq 320$  pg/mL and  $< 320$  pg/mL, respectively.

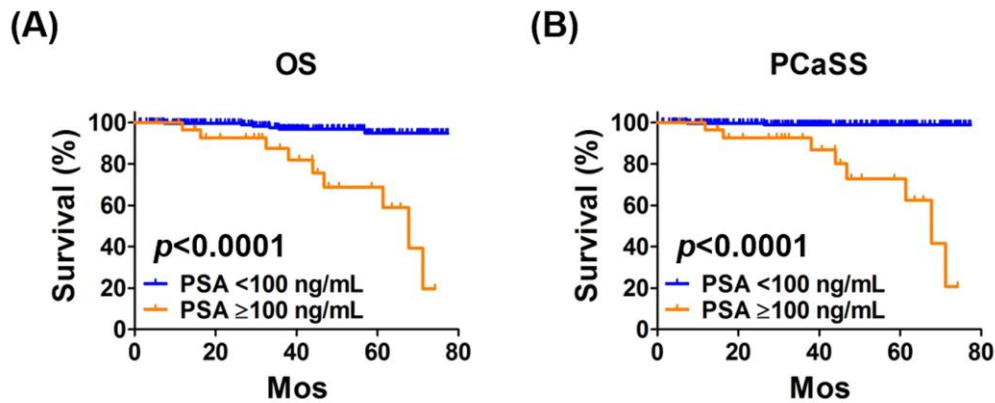

**Supplementary Fig. S4** – Kaplan-Meier curves of OS (A) and PCaSS (B) in 255 patients with PSA  $\geq 100$  ng/mL and PSA  $< 100$  ng/mL were drawn and statistically compared using log-rank test. Five-year OS rate was 68.8% and 94.8% in patients with PSA  $\geq 100$  ng/mL and PSA  $< 100$  ng/mL, respectively. Five-year PCaSS rate was 72.8% and 98.9% in patients with PSA  $\geq 100$  and PSA  $< 100$  ng/mL, respectively.

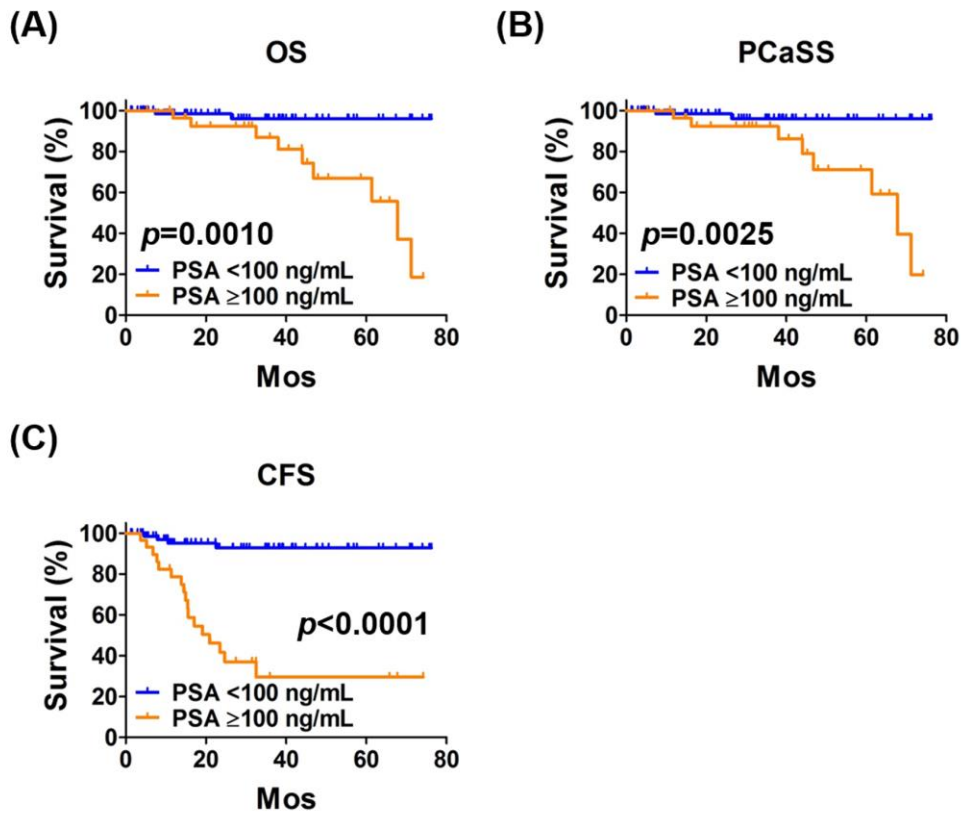

**Supplementary Fig. S5 – Kaplan-Meier curves of OS (A), PCaSS (B), and CFS**

(C) in 102 patients treated with ADT were drawn and patients with PSA  $\geq$ 100 ng/mL and PSA <100 ng/mL were statistically compared using log-rank test.

Five-year OS rate was 66.9% and 96.0% in patients with PSA  $\geq$ 100 ng/mL and PSA <100 ng/mL, respectively. Five-year PCaSS rate was 71.1% and 96.0% in patients with PSA  $\geq$ 100 ng/mL and PSA <100 ng/mL, respectively. Five-year CFS rate was 29.6% and 92.8% in patients with PSA  $\geq$ 100 ng/mL and PSA <100 ng/mL, respectively.

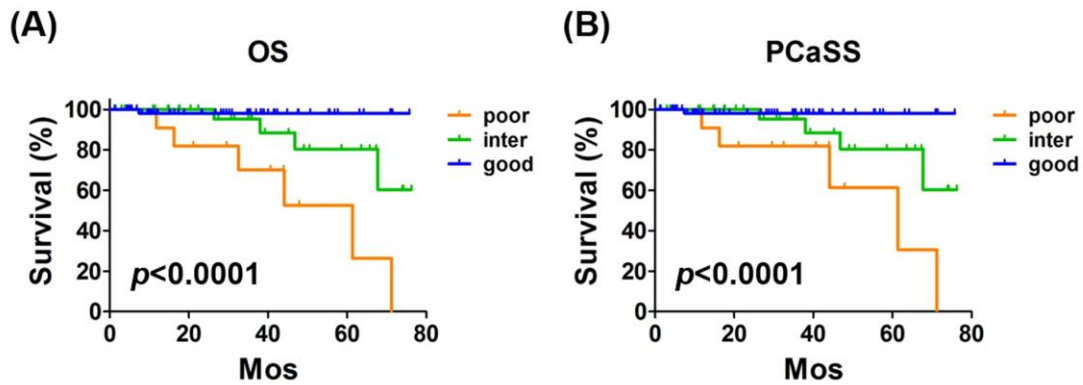

**Supplementary Fig. S6 – Kaplan-Meier curves of OS (A) and PCaSS (B) in 102**

patients treated with ADT were drawn and patients with poor, intermediate, and

good risk were statistically compared using log-rank test for trend. Five-year OS

rate was 52.6%, 80.4%, and 98.0% in patients with poor, intermediate, and good

risk, respectively. Five-year PCaSS rate was 61.4%, 80.4%, and 98.0% in

patients with poor, intermediate, and good risk, respectively.

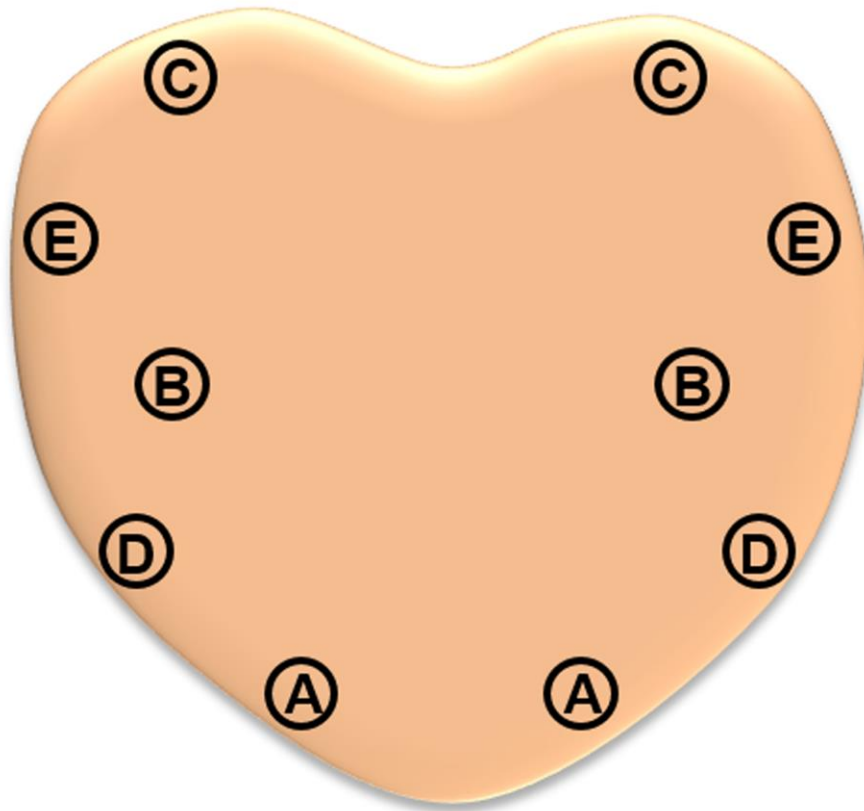

**Supplementary Fig. S7** – The sites of 10-core needle transrectal ultrasound-guided biopsy of prostate gland. The apex (A), middle (B), base (C), and two far lateral areas (D, E) of bilateral peripheral zones.

Supplementary Table S1. CCL2 of biopsied patients in various PSA ranges

| PSA,<br>ng/mL |                    | No malignancy    | PCa              | <i>p</i> |
|---------------|--------------------|------------------|------------------|----------|
| <41           | <i>n</i>           | 124              | 204              |          |
|               | Median CCL2, pg/mL | 224 (70.5-394)   | 246 (95.3-749)   | 0.0005   |
| <20           | <i>n</i>           | 117              | 184              |          |
|               | Median CCL2, pg/mL | 224 (70.5-394)   | 249 (95.3-749)   | 0.0008   |
| <10           | <i>n</i>           | 100              | 120              |          |
|               | Median CCL2, pg/mL | 220 (115-394)    | 240 (95.3-749)   | 0.0043   |
| 4< <41        | <i>n</i>           | 107              | 194              |          |
|               | Median CCL2, pg/mL | 224 (70.5-394)   | 247 (95.3-749)   | 0.0008   |
| 4< <20        | <i>n</i>           | 100              | 174              |          |
|               | Median CCL2, pg/mL | 225.5 (70.5-394) | 251.5 (95.3-749) | 0.0013   |
| 4< <10        | <i>n</i>           | 83               | 110              |          |
|               | Median CCL2, pg/mL | 223 (140-394)    | 243.5 (95.3-749) | 0.0052   |

PCa = prostate cancer, PSA = prostate-specific antigen. Values in parentheses indicate range.



Supplementary Table S2. PCa patients background according to CCL2

|                     |                   | Overall             | CCL2 $\geq$ 320<br>pg/mL | CCL2 <320<br>pg/mL | <i>p</i>            |
|---------------------|-------------------|---------------------|--------------------------|--------------------|---------------------|
| Total, <i>n</i>     |                   | 255                 | 45                       | 210                |                     |
| Median age, yr      |                   | 69 (46-89)          | 71 (52-83)               | 69 (46-89)         | 0.1565              |
| Median PSA, ng/mL   |                   | 10.6<br>(1.5-16702) | 13.1 (3.3-16702)         | 10.3 (1.5-3492)    | 0.1422              |
| T, <i>n</i>         | 1                 | 61                  | 7                        | 54                 | 0.0021              |
|                     | 2                 | 132                 | 21                       | 111                |                     |
|                     | 3                 | 47                  | 9                        | 38                 |                     |
|                     | 4                 | 15                  | 8                        | 7                  |                     |
| N, <i>n</i>         | 0                 | 228                 | 34                       | 194                | 0.0024              |
|                     | 1                 | 27                  | 11                       | 16                 |                     |
| M, <i>n</i>         | 0                 | 230                 | 36                       | 194                | 0.0154              |
|                     | 1b                | 17                  | 6                        | 11                 |                     |
|                     | 1c                | 8                   | 3                        | 5                  |                     |
| GS, <i>n</i>        | 6                 | 59                  | 7                        | 52                 | 0.0027              |
|                     | 7                 | 98                  | 13                       | 85                 |                     |
|                     | 8                 | 53                  | 10                       | 43                 |                     |
|                     | 9                 | 37                  | 12                       | 25                 |                     |
|                     | 10                | 8                   | 3                        | 5                  |                     |
| Treatment, <i>n</i> | cADT <sup>†</sup> | 78                  | 22                       | 56                 | 0.0784 <sup>‡</sup> |
|                     | +HDR              | 11                  | 3                        | 8                  |                     |
|                     | +seed             | 4                   | 1                        | 3                  |                     |
|                     | +EBRT             | 7                   | 1                        | 6                  |                     |
|                     | +RP               | 2                   | 0                        | 2                  |                     |
|                     | tADT              | 10                  | 0                        | 10                 |                     |
|                     | +HDR              | 47                  | 5                        | 42                 |                     |
|                     | +seed             | 32                  | 7                        | 25                 |                     |
|                     | +EBRT             | 7                   | 0                        | 7                  |                     |
|                     | +RP               | 16                  | 1                        | 15                 |                     |
|                     | HDR               | 2                   | 0                        | 2                  |                     |
|                     | Seed              | 17                  | 4                        | 13                 |                     |
|                     | RP                | 17                  | 1                        | 16                 |                     |
|                     | AS                | 5                   | 0                        | 5                  |                     |

PCa = prostate cancer, GS = Gleason score, cADT = continuous androgen-deprivation therapy, HDR = high-dose-rate brachytherapy, EBRT = external beam radiotherapy, tADT = temporary ADT, RP = radical prostatectomy, AS = active surveillance. <sup>†</sup>One hundred were combined androgen blockade and 2 were monotherapy. <sup>‡</sup>Treatments are divided into 3 groups; ADT alone, ADT+local therapy, and local therapy alone.

Supplementary Table S3. PCa patients background according to PSA

|                        |                   | Overall        | PSA ≥100<br>ng/mL  | PSA <100<br>pg/mL | <i>p</i>            |
|------------------------|-------------------|----------------|--------------------|-------------------|---------------------|
| Total, <i>n</i>        |                   | 255            | 30                 | 225               |                     |
| Median age, yr         |                   | 69 (46-89)     | 72.5 (46-86)       | 69 (50-89)        | 0.2371              |
| Median CCL2,<br>pg/mL  |                   | 246 (95.3-749) | 256.5<br>(165-593) | 246 (95.3-749)    | 0.067               |
| T, <i>n</i>            | 1                 | 61             | 1                  | 60                | < 0.0001            |
|                        | 2                 | 132            | 4                  | 128               |                     |
|                        | 3                 | 47             | 15                 | 32                |                     |
|                        | 4                 | 15             | 10                 | 5                 |                     |
| N, <i>n</i>            | 0                 | 228            | 11                 | 217               | < 0.0001            |
|                        | 1                 | 27             | 19                 | 8                 |                     |
| M, <i>n</i>            | 0                 | 230            | 11                 | 219               | < 0.0001            |
|                        | 1b                | 17             | 13                 | 4                 |                     |
|                        | 1c                | 8              | 6                  | 2                 |                     |
| GS, <i>n</i>           | 6                 | 59             | 0                  | 59                | < 0.0001            |
|                        | 7                 | 98             | 2                  | 96                |                     |
|                        | 8                 | 53             | 11                 | 42                |                     |
|                        | 9                 | 37             | 14                 | 23                |                     |
|                        | 10                | 8              | 3                  | 5                 |                     |
| Treatment,<br><i>n</i> | cADT <sup>†</sup> | 78             | 25                 | 53                | 0.0064 <sup>‡</sup> |
|                        | +HDR              | 11             | 1                  | 10                |                     |
|                        | +seed             | 4              | 0                  | 4                 |                     |
|                        | +EBRT             | 7              | 3                  | 4                 |                     |
|                        | +RP               | 2              | 0                  | 2                 |                     |
|                        | tADT              | 10             | 0                  | 10                |                     |
|                        | +HDR              | 47             | 1                  | 46                |                     |
|                        | +seed             | 32             | 0                  | 32                |                     |
|                        | +EBRT             | 7              | 0                  | 7                 |                     |
|                        | +RP               | 16             | 0                  | 16                |                     |
|                        | HDR               | 2              | 0                  | 2                 |                     |
|                        | Seed              | 17             | 0                  | 17                |                     |
|                        | RP                | 17             | 0                  | 17                |                     |
|                        | AS                | 5              | 0                  | 5                 |                     |

PCa = prostate cancer, GS = Gleason score, cADT = continuous androgen-deprivation therapy, HDR = high-dose-rate brachytherapy, EBRT = external beam radiotherapy, tADT = temporary ADT, RP = radical prostatectomy, AS = active surveillance. <sup>†</sup>One hundred were combined androgen blockade and 2 were monotherapy. <sup>‡</sup>Treatments are divided into 3 groups; ADT alone, ADT+local therapy, and local therapy alone
